# Supplementary material
Source: publisher figshare collection journal article supplement (https://frontiersin.figshare.com/ndownloader/files/17710412)
Supplement: Supplementary file [file 17710412]

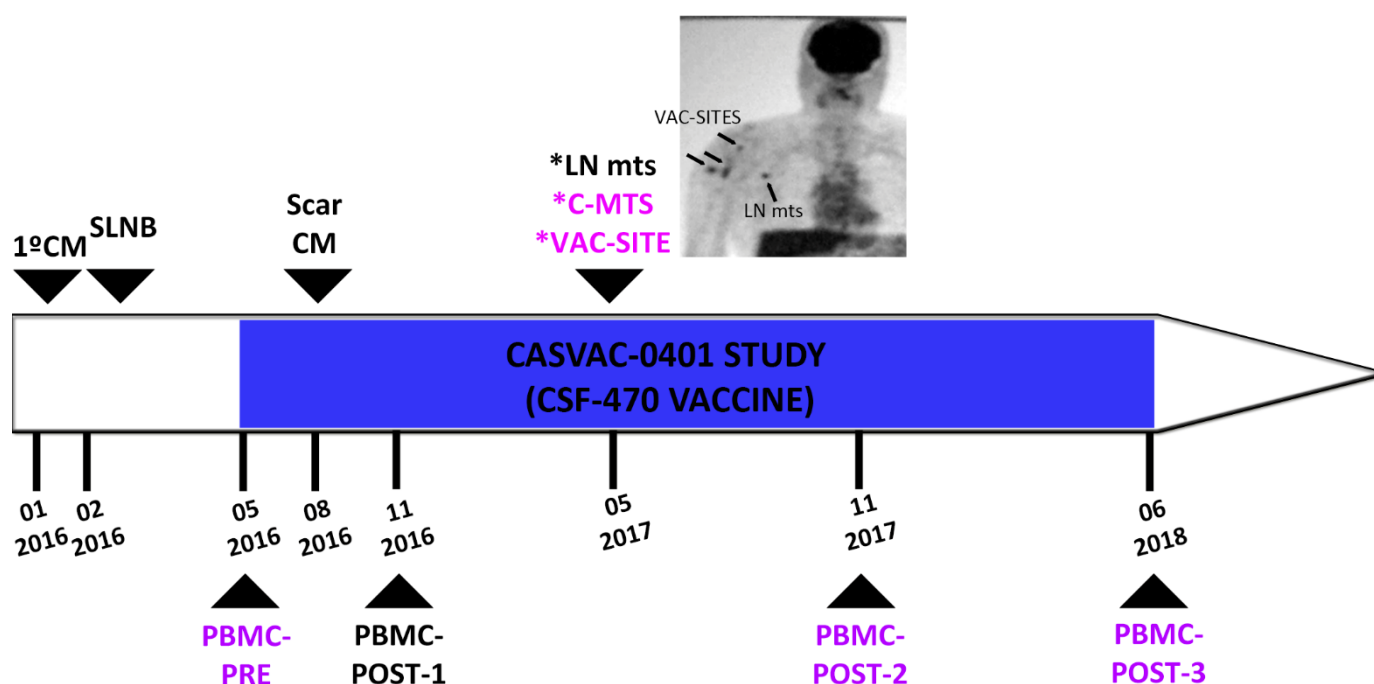

**Supplementary Figure 2. Pt-045 timeline.** (A) The pt-045 was randomized to the CSF-470 vaccine arm of the CASVAC-0401 study. Tumor resections of primary cutaneous melanoma (1°CM), sentinel lymph node biopsy (SLNB), Scar-CM, cutaneous metastasis (C-MTS) and inoculation sites (VAC-SITE) are indicated by triangles. Peripheral blood mononuclear cell (PBMC) samples were obtained at 0 (PBMC-PRE), 6 (PBMC-POST-1), 18 (PBMC-POST-2) and 25 months (PBMC-POST-3). Samples selected for TCR $\beta$  sequencing are shown in violet. *Inset:* LN-MTS and VAC-SITES detected by PET are indicated with arrows.
